# Supplementary material
Source: publisher figshare collection journal article supplement (https://acs.figshare.com/ndownloader/files/31716821)
Supplement: Supplementary file 1 [file 31716821]

## **SUPPORTING INFORMATION**

### **Wearable Triboelectric Sensors with Self-Powered Energy: Multifunctional Laser-Engraved Electrets to Activate Satellite Communication for Life Emergency Alert in Pandemics**

Surachate Kalasin<sup>1\*</sup>, Pantawan Sangnuang<sup>2</sup>, Werasak Surareungchai<sup>2,3</sup>

<sup>1</sup>Faculty of Science and Nanoscience & Nanotechnology Graduate Program, King Mongkut's University of Technology Thonburi, 10140, Thailand

<sup>2</sup>Pilot Plant Research and Development Laboratory, King Mongkut's University of Technology Thonburi, 10150, Thailand

<sup>3</sup>School of Bioresource and Technology, King Mongkut's University of Technology Thonburi, 10150, Thailand

\*Corresponding author: Surachate Kalasin, E-mail: [surachate.kal@kmutt.ac.th](mailto:surachate.kal@kmutt.ac.th)

## **Table of Contents**

**Figure S1:** Theoretical derivation for fast charge accumulation by SETENG

**Figure S2:** Theoretical extracted curves for fast charge accumulation with different of  $C_0/C$

**Figure S3:** Theoretical calculation for a ratio between SETENG surface charge with and without-VMC circuit

**Figure S4:** Output voltage and current densities obtained for SETENG

**Figure S5:** Output power densities obtained for SETENG at different loading resistances

**Figure S6:** Capacitance response for the laser-engraved electret with continuous angle change

**Figure S7:** The response time of laser-engraved electret at the pressure detection limit

**Table S1:** Comparison of this output performance of the capacitive electret with other capacitive sensors

**Figure S8:** Output triboelectric current of single-electrode TENG under a human finger pressure

**Video S1:** The self-powered SETENG wearable sensor for sending life-emergency requests

**Video S2:** Demonstration to activate the SETENG wearable sensor

**Video S3:** Demonstration of SETENG wearable sensor to light on several LEDs

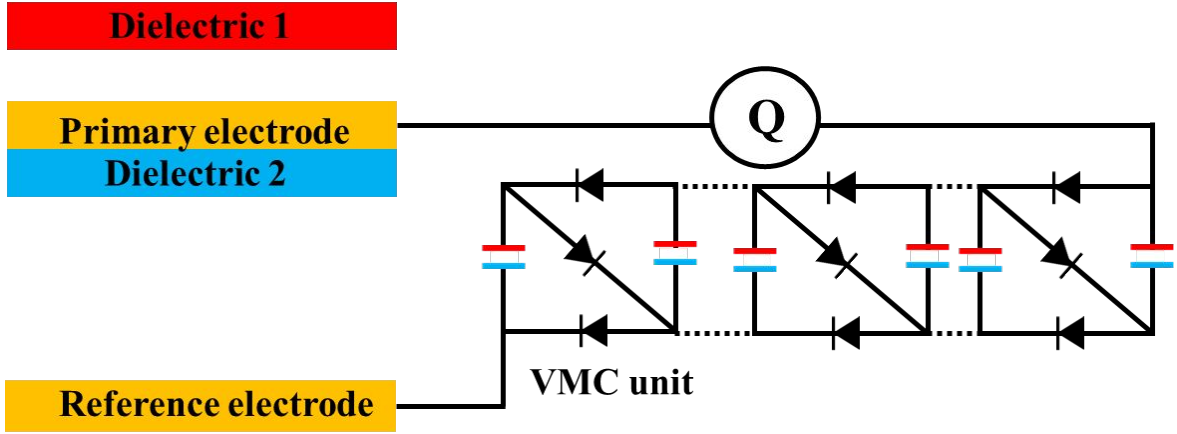

**Figure S1.** Schematic diagram of single-electrode TENG (SETENG) integrated with voltage multiplier units (VMC) for accelerated charge accumulation.

The calculation of fast charge accumulation in SETENG was adapted from the previous publication of two-electrode mode TENG.<sup>1</sup> As demonstrated in Figure S1, the capacitance and charge quantity of single-electrode TENG (SETENG) and capacitors are denoted by  $C$ ,  $Q$  and  $C_o$ ,  $Q_o$ , respectively during its initial position. After a dielectric 1 contacted with the primary electrode that attached to the dielectric 2, the charge of SETENG is obtained as

$$\frac{Q_o}{C_o} = \frac{Q_1}{C} \quad (1)$$

$$Q_1 = \frac{CQ_o}{C_o} \quad (2)$$

During the first contact of SETENG after its original state, charge transferred from SETENG to the capacitors is  $\frac{Q_1}{2}$ . When TENG is separated, the charge transferring from the capacitors back to SETENG is  $Q_2$ , then the expression can be written as

$$\frac{Q_o + \frac{Q_1}{2} - Q_2}{C_o} = \frac{Q_2}{C} \quad (3)$$

$$Q_2 = \left(Q_o + \frac{Q_1}{2}\right) \cdot \left(1 + \frac{C_o}{C}\right)^{-1} \quad (4)$$

Equivalently, the charge transferred to SETENG for the second contact is  $Q_3$ . Later when they are separated, the charges from capacitors moved back to SETENG is  $\frac{Q_3}{2}$ , one can rewrite as

$$\frac{Q_o + \frac{Q_1}{2} + \frac{Q_2}{2} - Q_3}{C_o} = \frac{Q_3}{C} \quad (5)$$

$$Q_3 = \left( Q_o + \frac{Q_1}{2} + \frac{Q_2}{2} \right) \cdot \left( 1 + \frac{C_o}{C} \right)^{-1} \quad (6)$$

Similarly for n contacts by SETENG, one can find the relationship as

$$Q_n = \left( Q_o + \frac{Q_1}{2} + \frac{Q_2}{2} + \frac{Q_3}{2} \cdots + \frac{Q_{n-1}}{2} \right) \cdot \left( 1 + \frac{C_o}{C} \right)^{-1}, \text{ for } n \geq 2 \quad (7)$$

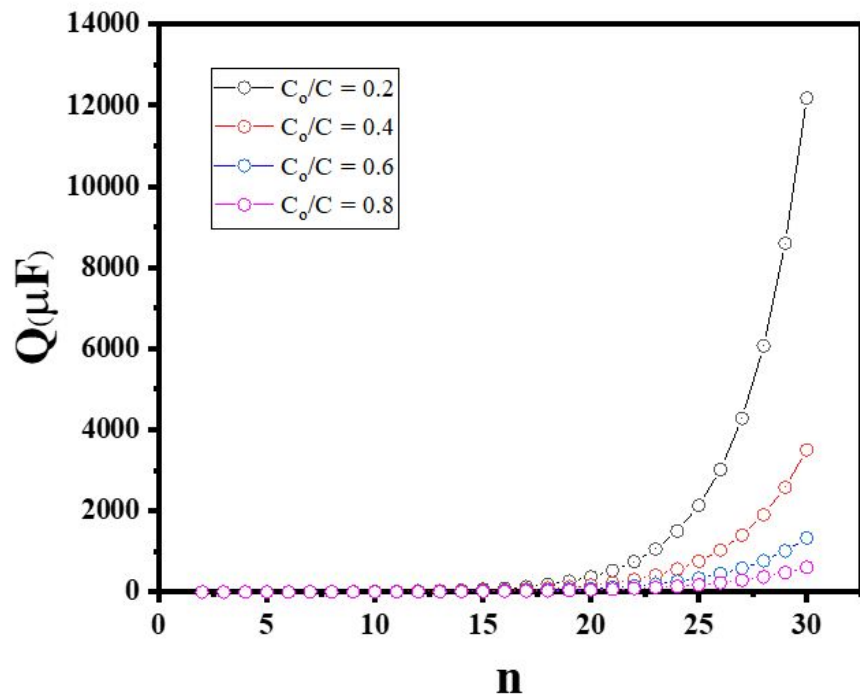

**Figure S2.** Theoretical calculation for accumulated charges by single-electrode TENG vs. the number of times of contact-separation at different ratios of  $C_o/C$  and  $Q_o = 1 \mu F$ .

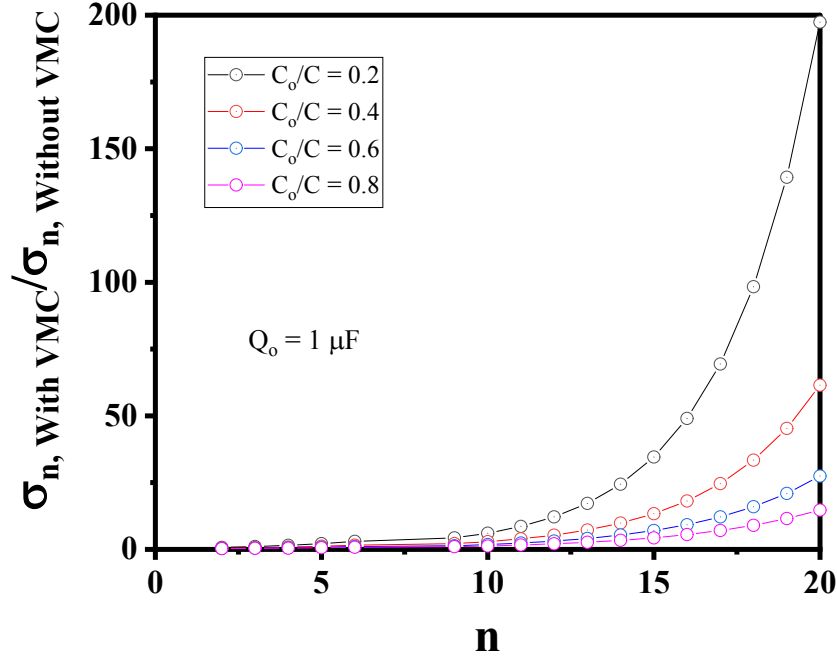

**Figure S3.** Theoretical calculation for a ratio between SETENG surface charge with and without-VMC circuit vs. the number of times of contact-separation at different ratios of  $C_o/C$  and  $Q_o = 1 \mu\text{F}$ .

The charge density of SETENG can be derived as

$$\sigma = \frac{\varepsilon_0 \varepsilon_r V}{d} \quad (8)$$

Where  $\varepsilon_0$  is the vacuum dielectric permittivity,  $\varepsilon_r$  denotes as relative permittivity,  $d$  is a separation distance, and  $V$  is the excitation voltage applied to TENG. Without the integration of VMC circuit, the SETENG surface charge with the number of times of contact-separation is define as

$$\sigma_{n, \text{without VMC}} = \frac{\varepsilon_0 \varepsilon_r Q_1}{dC} \quad (9)$$

Where in all cases,  $C$  is SETENG capacitance, while  $Q_1$  is the charge quantity at the first contact-separation. It assumes that all charges from SETENG go through an energy harvesting

system. For the case of VMC circuit integrated into SETENG, the surface charge with the number of times of contact-separation is described as

$$\sigma_{n, with VMC} = \frac{\varepsilon_0 \varepsilon_r Q_n}{dC} \quad (10)$$

Where  $Q_n$  is obtained from Equation (7) above.

The ratio of with and without-VMC SETENG surface charge can be written as

$$\frac{\sigma_{n, with VMC}}{\sigma_{n, without VMC}} = \frac{Q_n}{Q_1} \quad (11)$$

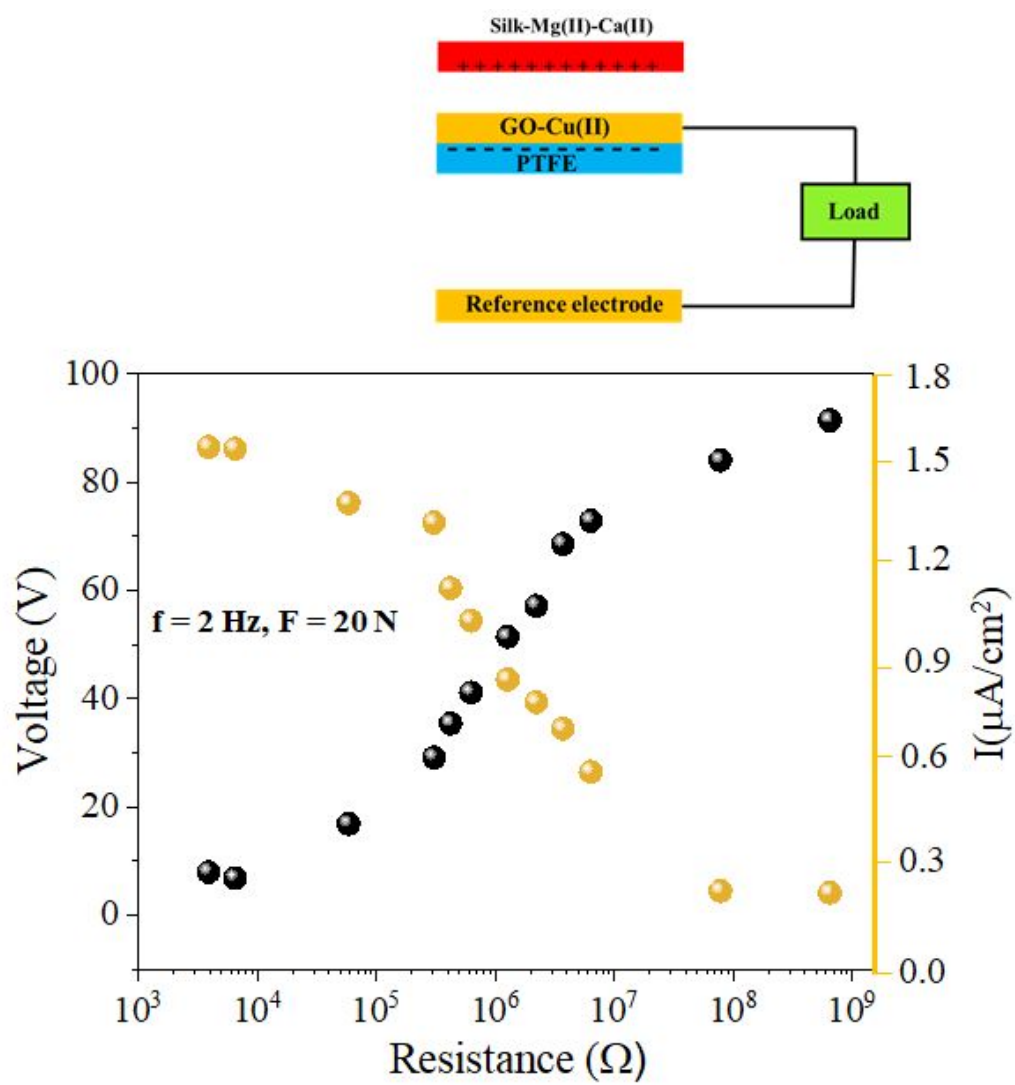

**Figure S4.** Output voltage and current density obtained for SETENG at different loading resistances.



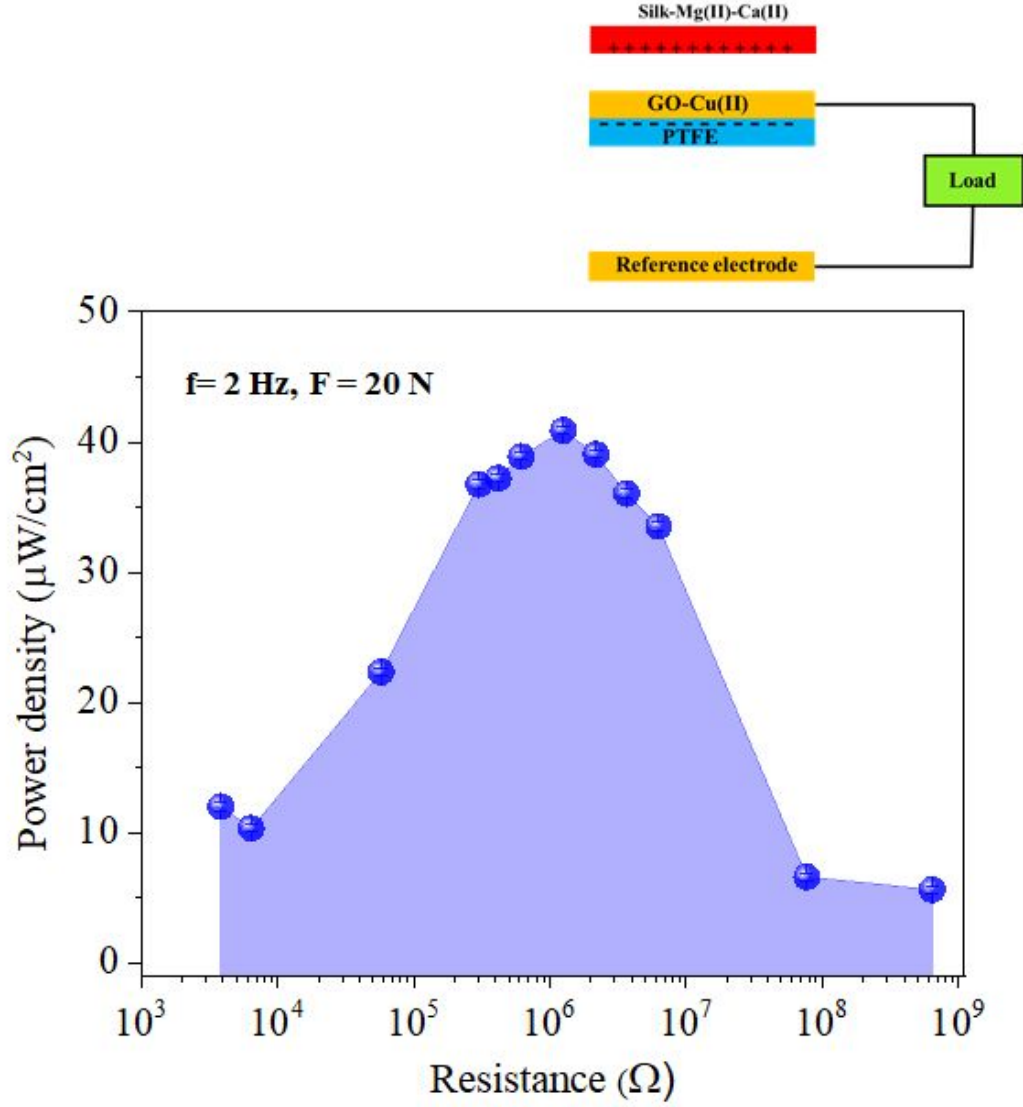

**Figure S5.** Output power density obtained for SETENG at different loading resistances.

The power density of the SETENG structure was obtained according to the expression as

$$P_{density} = \frac{P}{A} = \frac{I^2 R}{A} \quad (12)$$

where  $P_{density}$  is defined as the power density,  $P$  is the obtained power,  $R$  is the load resistance,  $I$  is the output current, and  $A$  is the effective contact area of SETENG.

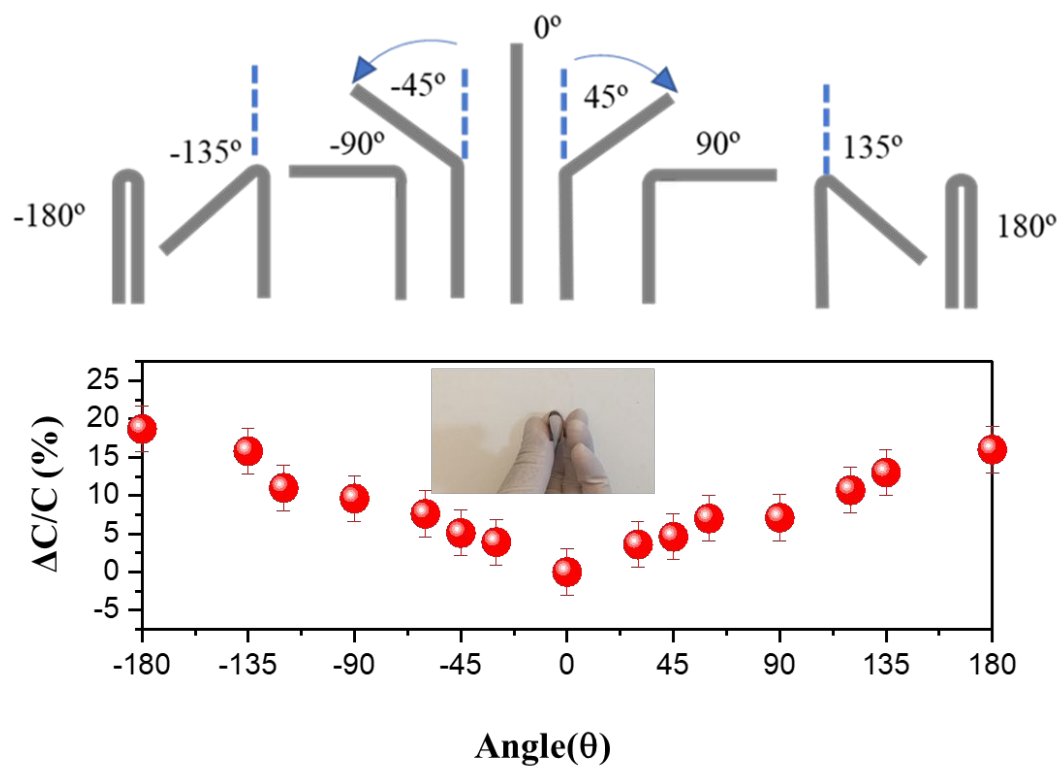

**Figure S6.** Normalized capacitance response for the laser-engraved electret with continuous angle change.

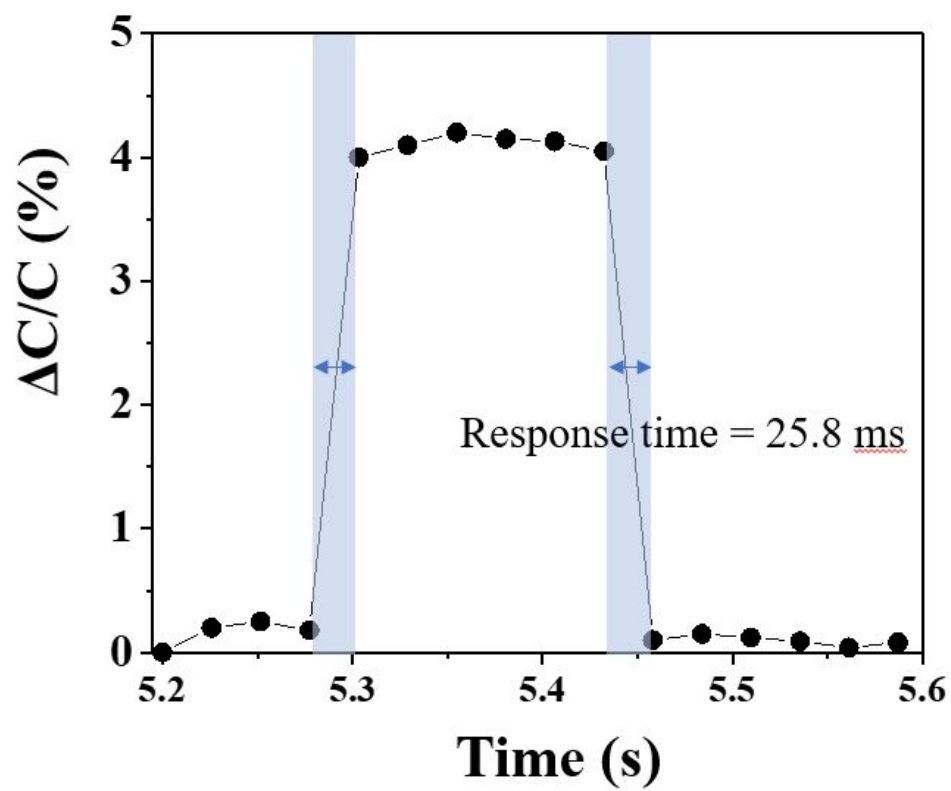

**Figure S7.** The response time of laser-engraved electret at the pressure detection limit of 1.9 Pa.

**Table S1**

Comparison of this output performance of the capacitive electret with other capacitive sensors.

| Materials                     | Sensitivity<br>(Range)           | Detection<br>Limit | Response<br>Time | Ref       |
|-------------------------------|----------------------------------|--------------------|------------------|-----------|
| Microporous CNT/Ecoflex       | 0.6 kPa <sup>-1</sup> (5 kPa)    | 0.2 Pa             | n/a              | [2]       |
| GO/PDMS/Nylon                 | 0.3 kPa <sup>-1</sup> (1 kPa)    | 3.3 Pa             | 20 ms            | [3]       |
| PDMS/rGO                      | 0.002 kPa <sup>-1</sup> (10 kPa) | 0.5 kPa            | 200 ms           | [4]       |
| AgNWs/Polyurethane            | 8.3 kPa <sup>-1</sup> (1 kPa)    | 0.5 Pa             | 27.3 ms          | [5]       |
| Laser-engraved GO-Cu(II)/PTFE | 1.5 kPa <sup>-1</sup> (2.2 kPa)  | 1.9 Pa             | 25.8 ms          | This work |

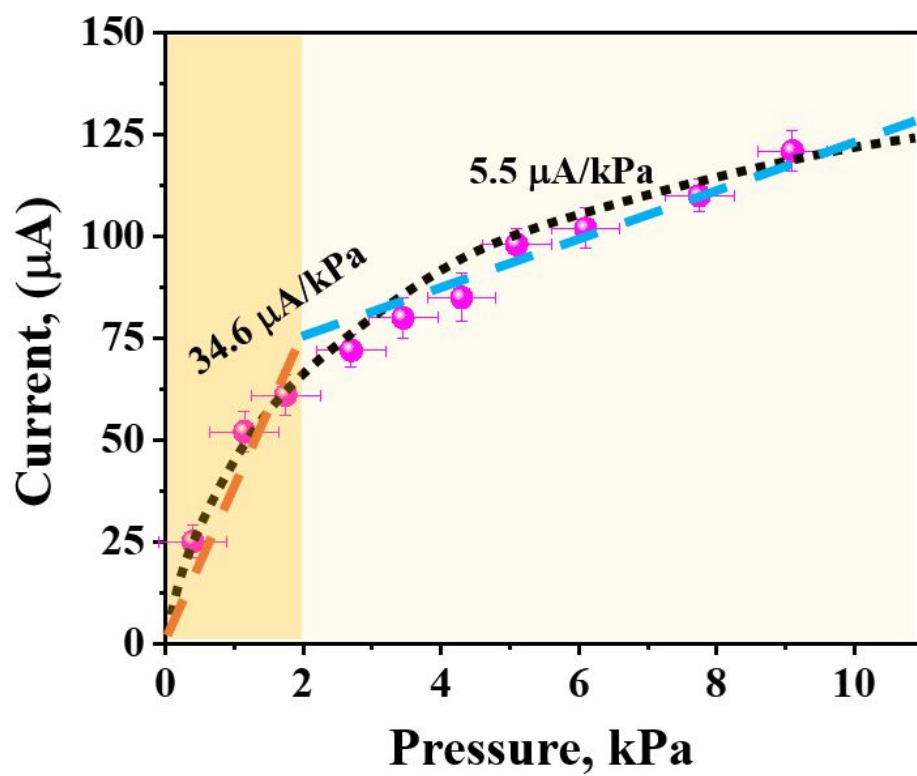

**Figure S8.** Output triboelectric current of single-electrode TENG under a human finger pressure.

**Video S1.** The self-powered SETENG wearable sensor for sending life-emergency requests.

**Video S2.** Demonstration to activate the SETENG wearable sensor by pressing the password “ACE”.

**Video S3.** Demonstration of SETENG wearable sensor to light on several LEDs.

## References

1. Li, Y.; Zhao, Z.; Liu, L.; Zhou, L.; Liu, D.; Li, S.; Chen, S.; Dai, Y.; Wang, J.; Wang, Z. L., Improved Output Performance of Triboelectric Nanogenerator by Fast Accumulation Process of Surface Charges. *Advanced Energy Materials* **2021**, *11* (14), 2100050.
2. Kwon, D.; Lee, T.-I.; Shim, J.; Ryu, S.; Kim, M. S.; Kim, S.; Kim, T.-S.; Park, I., Highly sensitive, flexible, and wearable pressure sensor based on a giant piezocapacitive effect of three-dimensional microporous elastomeric dielectric layer. *ACS applied materials & interfaces* **2016**, *8* (26), 16922-16931.
3. He, Z.; Chen, W.; Liang, B.; Liu, C.; Yang, L.; Lu, D.; Mo, Z.; Zhu, H.; Tang, Z.; Gui, X., Capacitive pressure sensor with high sensitivity and fast response to dynamic interaction based on graphene and porous nylon networks. *ACS applied materials & interfaces* **2018**, *10* (15), 12816-12823.
4. Ho, D. H.; Sun, Q.; Kim, S. Y.; Han, J. T.; Kim, D. H.; Cho, J. H., Stretchable and multimodal all graphene electronic skin. *Advanced Materials* **2016**, *28* (13), 2601-2608.
5. Yu, P.; Li, X.; Li, H.; Fan, Y.; Cao, J.; Wang, H.; Guo, Z.; Zhao, X.; Wang, Z.; Zhu, G., All-Fabric Ultrathin Capacitive Sensor with High Pressure Sensitivity and Broad Detection Range for Electronic Skin. *ACS Applied Materials & Interfaces* **2021**.
